1 ***Chemical defense acquired via pharmacophagy can lead to herd protection in***  
2 ***a sawfly***

3

4 Pragma Singh<sup>1,\*</sup>, Neil Grone<sup>1</sup>, Lisa Johanna Tewes<sup>1</sup> and Caroline Müller<sup>1</sup>

5 <sup>1</sup>Chemical Ecology, Bielefeld University, Universitätsstr. 25, 33615 Bielefeld, Germany

6

7 \*Corresponding Author:

8 Email: [pragya.singh42019@gmail.com](mailto:pragya.singh42019@gmail.com)

9 ORCID: <https://orcid.org/0000-0002-7411-3206>

10

11 ***Author Contributions***

12 Conceptualization and funding acquisition: CM; methods development/experimental design:

13 PS, CM; data collection: experiment 1 and 2: NG, PS, experiment 3: PS, chemical analysis:

14 PS, LJT; data validation and analysis: PS; data visualization: PS; experiment illustrations:

15 NG; writing original draft: PS, CM.

16

17 ***Acknowledgements***

18 This study was funded by the German Research Foundation (DFG) as part of the SFB TRR

19 212 (NC<sup>3</sup>), project number 396777467 (granted to CM).

20

21

22 ***Abstract***

23 Predation is an important selection pressure acting on organisms, with organisms evolving  
24 diverse anti-predator strategies to combat it. One such widespread strategy is chemical  
25 defense in which organisms either synthesize or extrinsically acquire defensive chemicals.  
26 Little is known about the intraspecific transfer of such chemicals and if such chemicals  
27 acquired from conspecifics can also serve as defense against predation. Here, we used adults  
28 of the turnip sawfly, *Athalia rosae*, which can acquire *neo*-clerodane diterpenoids  
29 (‘clerodanoids’) *via* pharmacophagy after exposure to the plant, *Ajuga reptans*. We show that  
30 clerodanoid access mediates protection against predation by mantids for the sawflies, both in  
31 a no-choice feeding assay and a microcosm setup. Moreover, even indirect access to  
32 clerodanoids, via nibbling on conspecifics that had access to the plant, resulted in protection  
33 against predation albeit to a much lower degree than direct access. Furthermore, sawflies that  
34 had no direct access to clerodanoids were less consumed by mantids when they were grouped  
35 with conspecifics that had direct access. Most, but not all, of such initially undefended  
36 sawflies could acquire clerodanoids from conspecifics that had direct access to the plant,  
37 although in low quantities. Together our results demonstrate that clerodanoids serve as  
38 chemical defense that can be intraspecifically transferred. Moreover, the presence of  
39 chemically defended individuals in a group can confer protection onto conspecifics that had  
40 no direct access to clerodanoids, suggesting a ‘herd-protection’ effect.

41

42 ***Keywords***

43 Sequestration, pharmacophagy, automimicry, plant-insect interaction, phytochemicals,  
44 *Hierodula patellifera* (Mantidae), Hymenoptera

45

## 46 **1. Introduction**

47 Predation is an important biotic factor that many organisms in the wild encounter. To defend  
48 themselves, organisms exhibit a wide diversity of anti-predator strategies (Edmunds, 1974;  
49 Eisner *et al.*, 2005; Bergen & Beldade, 2019; Rowland *et al.*, 2020). Chemical defense is one  
50 such anti-predator strategy that is widespread amongst organisms, ranging from  
51 microorganisms (Matz *et al.*, 2008) to multicellular organisms (Santos *et al.*, 2016; Pančić &  
52 Kiørboe, 2018; Sugiura, 2020). Such defensive chemicals can either be synthesized *de-novo*  
53 or acquired extrinsically, for example, from the host plant diet (Opitz & Müller, 2009; Erb &  
54 Robert, 2016; de Castro *et al.*, 2021). For example, the oleander aphid, *Aphis nerii*, sequesters  
55 cardenolides from its host plant species, and utilizes these defensive compounds against both  
56 vertebrate and invertebrate predators (Züst *et al.*, 2018). Alternatively, organisms can  
57 specifically take up defensive chemicals independently of nutritional requirements, e.g. *via*  
58 pharmacophagy (Boppré, 1984; Nishida, 2014; Paul *et al.*, 2021b). For example, adults of  
59 some danaine butterfly species actively incorporate defensive chemicals like pyrrolizidine  
60 alkaloids from sources such as dried plant parts (Lawson *et al.*, 2021; Tea *et al.*, 2021). While  
61 these acquired chemicals confer protection on the individual taking them up, it is less well-  
62 elucidated whether and how this protection can extend to conspecifics that may not have  
63 access to these chemicals directly from the source.

64 The possibility that chemically defended individuals confer protection from predation on  
65 initially undefended conspecifics, what we coin as ‘herd-protection’, could be realized *via*  
66 different means. For example, individuals could acquire such chemicals not only directly from  
67 the (plant) source but also indirectly via intraspecific (Lawson *et al.*, 2021; Paul *et al.*, 2021a)  
68 or interspecific (Hashimoto & Hayashi, 2014; Tea *et al.*, 2021) interactions. Such indirectly  
69 acquired chemicals could then be used in the context of defense against predation.

70 Alternatively, after attacking a chemically defended individual, a predator may be deterred

71 from attacking even chemically undefended conspecifics if it associates the phenotype with  
72 chemical defense by learned aversion or avoidance (Berenbaum & Miliczky, 1984;  
73 Hämäläinen *et al.*, 2020; Tuttle *et al.*, 2021). This phenomenon is often seen in combination  
74 with automimicry, wherein undefended individuals (mimics) benefit from the unpalatability  
75 of defended individuals (models) (Brower *et al.*, 1970; Aubier *et al.*, 2017). Furthermore,  
76 unpalatability or unprofitability of organisms is often associated with bright or aposematic  
77 coloration that functions as warning signal to predators (Cyriac & Kodandaramaiah, 2019;  
78 Kikuchi *et al.*, 2021). There is usually positive density-dependence in aposematism, such that  
79 conspicuous warning signals are more effective when they are common (Chouteau *et al.*,  
80 2016; Kikuchi *et al.*, 2021).

81 Understanding how the presence of chemically defended individuals affects the rest of the  
82 population is an important question as studies have shown that there can be intraspecific  
83 variation in chemical defense, with some individuals lacking chemical defenses entirely (Best  
84 *et al.*, 2018; Prudic *et al.*, 2019; Sculfort *et al.*, 2020; Mattila *et al.*, 2021). Such variation  
85 could arise if the defensive chemicals have an associated cost, for example, for acquisition  
86 and/or maintenance of the chemical defense (Dimarco & Fordyce, 2017). Variation may also  
87 be influenced by intrinsic factors such as the age, sex, reproductive phase or immunological  
88 status of the individuals (Smilanich *et al.*, 2009; Zvereva & Kozlov, 2015; Arias *et al.*, 2016).  
89 In such scenarios with intraspecific variation in chemical defense, the degree of protection  
90 from predation for chemically undefended individuals depends on the frequency of defended  
91 and non-defended individuals (Gamberale-Stille & Guilford, 2004; Finkbeiner *et al.*, 2018).  
92 At higher density of chemically defended individuals, the motivation of predators could be  
93 reduced to search for undefended prey (Skelhorn *et al.*, 2011), it may be harder to detect  
94 undefended prey (Gamberale-Stille & Guilford, 2004; Skelhorn *et al.*, 2011), or more  
95 undefended individuals could indirectly access the chemicals and gain protection.

96 An excellent model system for examining the effect of defensive chemicals in deterring  
97 predation both directly and indirectly is the turnip sawfly, *Athalia rosae* (Hymenoptera:  
98 Tenthredinidae). The larvae of this species are well-studied for sequestering metabolites, i.e.  
99 glucosinolates, of their Brassicaceae host plants, which act as defense against various  
100 invertebrate and vertebrate predators (Müller & Brakefield, 2003; Müller & Arand, 2007;  
101 Opitz *et al.*, 2010; Matsubara & Sugiura, 2017). The bright orange adults still contain  
102 glucosinolates sequestered by the larvae (Müller & Sieling, 2006) but do not seem to be  
103 protected by these compounds against predators such as birds and lizards (Vlieger *et al.*,  
104 2004; Boevé & Müller, 2005). However, *A. rosae* adults can additionally acquire other  
105 specialized metabolites, *neo*-clerodane diterpenoids (potentially together with other  
106 compounds, hereafter called clerodanoids), by pharmacophagy from certain plant species,  
107 such as *Ajuga reptans* or *Clerodendrum trichotomum* (both Lamiaceae) (Kawai *et al.*, 1998).  
108 Some of the clerodanoids found in insect bodies are likely slightly modified metabolic  
109 products from plant derived clerodanoids (Amano *et al.*, 1999; Paul *et al.*, 2021a). Moreover,  
110 these compounds can be acquired indirectly by nibbling on conspecifics that were exposed to  
111 plant material (Paul *et al.*, 2021a). While effects of clerodanoids on mating behavior have  
112 been shown previously (Amano *et al.*, 1999; Paul & Müller, 2021), empirical evidence for  
113 other functions such as in defense against predation is scarce and indirect (Nishida & Fukami,  
114 1990). In the laboratory, the cultures are usually maintained without *A. reptans* leaves,  
115 suggesting that clerodanoid access is not essential for the sawflies' survival (Paul *et al.*,  
116 2021b, 2021a; Paul & Müller, 2021). Moreover, there is evidence for associated costs of  
117 clerodanoid uptake in *A. rosae*, such that adults with clerodanoid access exhibit a reduced  
118 lifespan (Zanchi *et al.*, 2021). Thus, most likely there is intraspecific variation in clerodanoid  
119 status by *A. rosae* in the wild.

120 We aimed to study whether uptake of clerodanoids can function as defense against predation  
121 both for focal individuals that directly acquire these compounds after access to plants, and  
122 indirectly for other conspecifics that come into contact with the focal individuals. Therefore,  
123 we observed the response of mantid predators in no-choice feeding assays to sawflies that  
124 either had access to clerodanoids directly from plants or indirectly from conspecifics or had  
125 no access (experiment 1). Next, we investigated survivorship of sawflies with or without  
126 clerodanoid access in both presence and absence of a predator (experiment 2). Lastly, we  
127 investigated if the presence of sawflies with clerodanoid access conferred protection from  
128 predation on conspecifics with no clerodanoid access and if this varied with their relative  
129 abundance (experiment 3). We also investigated the clerodanoid acquisition of sawflies from  
130 different treatments using chemical analysis (experiment 3). We predicted that both direct and  
131 indirect clerodanoid acquisition should lead to protection from predation by the mantids.  
132 Furthermore, presence of chemically defended sawflies should confer protection from  
133 predation on conspecifics, with protection increasing with proportion of chemically defended  
134 individuals in the group. We also expect sawflies without clerodanoid access that were  
135 grouped with conspecifics with clerodanoid access to acquire clerodanoids.

136

## 137 **2. Materials and Methods**

### 138 **(a) Experimental animals**

139 The individuals of *A. rosae* used in this experiment were taken from a laboratory culture  
140 established using adults collected in the surroundings of Bielefeld, Germany, and  
141 supplemented annually with field-caught insects. The culture was maintained in mesh cages  
142 (60 x 60 x 60 cm) with overhead lighting in a laboratory at room temperature with a 16 h: 8 h  
143 light: dark cycle and ~60% relative humidity. Multiple females and males were put in a cage

144 and provided with *Sinapis alba* (Brassicaceae) plants for the females to oviposit. Emerging  
145 larvae were raised on *Brassica rapa* var. *pekinensis* (Brassicaceae) plants. Males and females  
146 were collected and separated within two days of pupal eclosion. Adults were kept in a climate  
147 chamber at 20 °C (16 h: 8 h light: dark cycle, 70 % relative humidity) before being used in  
148 experiment 1 and 2, and were kept in the laboratory under culture conditions for experiment  
149 3. All adults were fed a maintenance diet of a honey-water mixture (1:50 dilution). Adults  
150 were allocated randomly to the different treatments of no clerodanoid access (C-), direct  
151 clerodanoid access (C+) or indirect clerodanoid access (AC+). For the C+ treatment, adults  
152 got access to a leaf section (0.8 cm<sup>2</sup>) of *A. reptans* for 48 hours, while for C- no *A. reptans*  
153 leaf was provided. For the AC+ treatment, adults got access to a C+ conspecific of the same  
154 sex (prepared as above) for 48 hours. *S. alba* plants were grown from seeds in a climate  
155 chamber (20 °C, 16 h: 8 h light: dark, 70% r.h.), while *B. rapa* and *A. reptans* plants were  
156 grown from seeds in a greenhouse ( $\geq 20$  °C, 16 h: 8 h light: dark, 70% r.h.).

157 Twenty-three sixth instar individuals of *Hierodula patellifera* (Mantidae) were purchased  
158 ([www.interaquaristik.de](http://www.interaquaristik.de)) and reared in individual cages (20 cm x 20 cm x 20 cm) on a diet of  
159 crickets in a climatized room (~20 °C) on a diet of crickets. The mantids used in the  
160 experiment were not exposed to the sawflies before experiment 1, and were starved 48 hours  
161 before experiment 1. Each mantid was offered a cricket before experiment 2 and 3 to avoid  
162 starvation effects over the experimental days, and those individuals that did not consume the  
163 cricket were excluded as mantids usually stop eating when nearing a molt.

164 **(b) Experiment 1: No-choice feeding assay to examine effect of clerodanoid access on**  
165 **predator deterrence**

166 Mantids were placed individually in transparent containers (9.5 cm diameter, 20 cm height),  
167 one C-, C+ or AC+ female sawfly was introduced in the container (figure 1a), and the mantid  
168 response was noted. Each assay was conducted for 15 minutes unless the sawfly was

169 consumed before this, at which point the assay was terminated. The predator response  
170 variables examined during the assay were number of attacks on sawfly, whether sawfly was  
171 discarded after mouth contact (SI 1a,b), and whether sawfly was consumed (SI 1c).

172 Discarding after mouth contact was a distinct behavior by the mantid, and could clearly be  
173 distinguished from the sawfly slipping or escaping from the mantid's grab. For individuals  
174 that were attacked multiple times, we noted discarding as yes if the individual was discarded  
175 after mouth contact even once.

176 Sawflies of all treatments were offered to all mantids but in different orders; six mantids  
177 received *A. rosae* in the order C+, AC+, C-, seven in the order C-, C+, AC+, and seven in the  
178 order AC+, C-, C+ (total number of replicates N = 20). Upon noticing the sawfly, the mantids  
179 would orient for an attack. However, we did not compare the latency until attack, because the  
180 position of the mantids and how readily they noticed the sawflies differed between replicates.  
181 Two mantids did not attack sawflies of any of the treatments during the assay and were thus  
182 excluded from analysis as these mantids afterwards molted. We did not examine the long-  
183 term survivorship of sawflies that were discarded after attack by mantids, but damage to the  
184 sawfly spanned the spectrum from none to lethal (SI 1a-c).

185 We expected mantids to attack C- sawflies but not AC+ or C+ sawflies, e.g., if there were any  
186 repellent olfactory cues associated with uptake of clerodanoids by the sawflies. If AC+ or C+  
187 individuals were attacked, we expected the mantids to discard the sawflies after tasting  
188 deterrent compounds and thus not consume them.

189 **(c) Experiment 2: Microcosm experiment to investigate clerodanoid access effect on**  
190 **survivorship in predator presence or absence**

191 We used a fully factorial design (clerodanoid access x mantid presence) to evaluate the effect  
192 of clerodanoid acquisition on sawfly survival in the presence of a mantid predator in a



193 microcosm (figure 2a). The four treatments were C- sawfly without mantid (C-M-), C- sawfly  
194 with mantid (C-M+), C+ sawfly without mantid (C+M-) and C+ sawfly with mantid (C+M+)  
195 with a sample size of eleven, ten, ten, and eight, respectively. All trials were performed in  
196 microcosm cages (25 cm diameter, 26 cm height) with a honey-water supply. The cages were  
197 kept in a climate room at 20 °C (16 h: 8 h light: dark cycle, 70% relative humidity) for the  
198 duration of the experiment. For each trial, we used five sawflies (three females and two  
199 males) and one or no mantid. We counted the number of sawflies alive every half-day for  
200 three days. For the mantid present trials, we also counted the number of sawflies ‘dead but not  
201 consumed’ at the end of three days, as sawflies may be attacked but not necessarily always  
202 completely consumed, e.g. if they are unpalatable. For these replicates, we calculated the  
203 number of consumed individuals as the difference between initial number of sawflies and the  
204 number of sawflies alive or ‘dead but not consumed’. This experiment was conducted two  
205 weeks after experiment 1 and the mantids were fed a cricket diet in the meantime. We  
206 expected C- with mantids to have reduced survival than sawflies in the other treatments.  
207 Moreover, we expected more C+ sawflies to be consumed by the mantids with time, which  
208 could be either due to a decreasing concentration of the clerodanoids or to prolonged  
209 starvation of the mantids.

210 **(d) Experiment 3: Predation on C- conspecifics in mixed groups of C+ and C- sawflies in**  
211 **microcosm**

212 We aimed to test whether presence of C+ sawflies led to defense against predation also for C-  
213 sawflies. Therefore, we set up four group-composition treatments, consisting of varying  
214 relative abundance of C+ and C- sawflies, keeping the total abundance of sawflies fixed at  
215 six. We chose six as the total abundance as we knew from experiment 2 that mantids can  
216 consume up to 5 C- *A. rosae* adults over a period of 1-3 half-days. The first group-  
217 composition treatment consisted of six C- sawflies (6C-), and the other three mixed group-

218 compositions treatments were: two C+ and four C- sawflies (2C+4C-), three C+ and three C-  
219 sawflies (3C+3C-), and four C+ and two C- sawflies (4C+2C-). For each replicate, we joined  
220 the sawflies together in one petri dish according to the assigned group treatment two hours  
221 prior to adding them to the microcosm, to allow the sawflies to interact (e.g., mate or nibble).  
222 We used eighteen mantids for the experiment, and a microcosm cage set-up identical to  
223 experiment 2. Each mantid was exposed to all group treatments in random order over multiple  
224 trials (four trials per mantid), with each trial lasting two days. Each mantid was fed a small  
225 cricket prior to each trial. For the mixed group-compositions treatments containing both C+  
226 and C- individuals, we used only females as C- and males as C+. Using the different sexes  
227 allowed us to distinguish between C- and C+ individuals in each replicate. From experiment  
228 2, we know that both male and female sawflies are consumed by mantids (see Results). In  
229 *A. rosae* adults, males are usually smaller than females (Sawa *et al.*, 1989; Travers-Martin &  
230 Müller, 2008), making it potentially easier for C- females to nibble and gain access to  
231 clerodanoids from C+ males. At the end of each trial, we counted the number of alive or ‘dead  
232 but not consumed’ C+ and C- sawflies for each replicate. We calculated the number of  
233 consumed C- sawflies as the difference between initial number of C- sawflies and number of  
234 C- sawflies alive or ‘dead but not consumed’. Similarly, we calculated the number of  
235 consumed C+ sawflies. We hypothesized that the presence and increasing abundance of C+  
236 sawflies should lead to protection from predation for C- sawflies.

### 237 **(e) Chemical analysis of sawflies from experiment 3**

238 To test whether C- sawflies in mixed group-composition treatments acquired clerodanoids  
239 compared to 6C- replicates, we collected C- sawflies from different group-composition  
240 treatments and analysed them chemically. We also collected C+ sawflies to confirm their  
241 clerodanoid acquisition. Lastly, we examined if C+ sawflies differed from C- sawflies of  
242 mixed group-composition treatment in the amount of clerodanoid acquired, i.e. if there is a

243 difference between amount acquired directly from plant leaves or indirectly from  
244 conspecifics. We only collected individuals from replicates that had intact sawflies left at the  
245 end of the trial and stored them at -80 °C until further analysis. The final sample size for C-  
246 sawflies chemically analysed was six, five, seven, and five samples each of 6C-, 2C+4C-,  
247 3C+3C- and 4C+2C- group-composition treatments, respectively. The final sample size for  
248 C+ sawflies was one, four and five from 2C+4C-, 3C+3C- and 4C+2C- group treatments,  
249 respectively. To extract putative clerodanoids from the sawflies, the individuals were freeze-  
250 dried and then homogenized using glass beads in a ball mill. Each individual was extracted  
251 twice by shaking for seven minutes at room temperature in ethyl acetate (LC-MS grade,  
252 VWR, Leuven, Belgium), and the supernatants were pooled to a final volume of 400 µl. The  
253 extracts were dried in a vacuum centrifuge at 35 °C. Dried extracts were suspended in 125 µl  
254 100% methanol (LC-MS grade, Fisher Scientific, Loughborough, UK) in an ultrasonic bath  
255 for 15 minutes, after which they were filtered using syringe filters (polytetrafluoroethylene  
256 membrane, 0.2 µm pore size, Phenomenex, Torrance, CA, USA). The samples were analyzed  
257 using ultra high performance liquid chromatography (UHPLC; Dionex UltiMate 3000,  
258 Thermo Fisher Scientific, San José, CA, USA) with a Kinetex XB-C18 column (1.7 µm, 150  
259 × 2.1 mm, with guard column, Phenomenex), and coupled to a quadrupole time of flight mass  
260 spectrometer (QTOF-MS; compact, Bruker Daltonics, Bremen, Germany), see SI 2 for  
261 details. The resulting chromatograms were processed with the software Compass Data  
262 Analysis 4.4 (Bruker Daltonics). The putative clerodanoids 482.22 m/z (C<sub>24</sub>H<sub>34</sub>O<sub>10</sub>) and  
263 484.23 m/z (C<sub>24</sub>H<sub>36</sub>O<sub>10</sub>) occur in the chromatograms as [M+HCOOH-H]<sup>-</sup> adducts resulting in  
264 features with 527.21 m/z and 529.23 m/z, respectively (Paul *et al.*, 2021a). We manually  
265 integrated the peak areas of these two features from the extracted ion chromatograms,  
266 extracted with 0.02 m/z accuracy.

267 We expected C- sawflies from mixed group-composition treatments to acquire clerodanoids,  
268 but to have lower amounts of clerodanoid compounds compared to C+ sawflies.

#### 269 **(f) Statistical analyses**

270 In experiment 1, we examined whether treatment had an effect on number of attacks, sawfly  
271 being discarded after mouth contact, and sawfly being consumed using a binomial generalized  
272 linear mixed-effects model (GLMM), with mantid identity as random effect. As there was  
273 quasi-complete separation in our data for two variables (sawfly being discarded after mouth  
274 contact and sawfly being consumed), i.e. the predictor variable could perfectly predict the  
275 response variable for a subset of our data, we fitted a Bayesian binomial GLMM using ‘blme’  
276 package (version 1.0-5, Chung *et al.*, 2013) for all variables. We evaluated if the order in  
277 which the mantid was presented the treatments influenced the mantid response variables by  
278 incorporating the trial round of a treatment as a fixed effect (due to only three levels) in each  
279 model, and this gave qualitatively similar results (not shown).

280 In experiment 2, we examined the effect of treatment, time and their two-way interaction on  
281 number of alive sawflies using a Poisson GLMM (‘lme4’ package version 1.1-27.1, Bates *et*  
282 *al.*, 2015) with replicate ID as random effect. We also examined if there was a significant  
283 difference in number of consumed and ‘dead but not consumed’ sawflies between C- and C+  
284 treatments with mantids (C-M+ and C+M+) using a Kruskal-Wallis test.

285 In experiment 3, we calculated the proportion of consumed, alive and ‘dead but not  
286 consumed’ C- with respect to the initial abundance of C- sawflies in that replicate. We  
287 examined whether the proportion of consumed, alive, and ‘dead but not consumed’ C-  
288 individuals differed significantly among the group-composition treatments using a binomial  
289 GLMM (‘lme4’ package), with mantid identity and trial number as random effects. We  
290 considered the number of C- individuals consumed/alive/‘dead but not consumed’ as

291 successes and initial number of C- present as the number of trials. Similarly, we calculated the  
292 proportion of consumed, alive, and ‘dead but not consumed’ C+ with respect to the initial  
293 abundance of C+ sawflies in that replicate. Finally, we examined if there was a significant  
294 difference in the amount (quantified based on peak area) of the two putative clerodanoid  
295 compounds between C- and C+ sawflies of mixed group-composition treatments using a  
296 Kruskal-Wallis test.

297 All data was analyzed using R 4.0.5 (2021-03-31) (R Core Team, 2021). We checked and  
298 tested model assumptions statistically and visually. Posthoc-tests were conducted using  
299 ‘multcomp’ package (version 1.4-17, Hothorn *et al.*, 2008).

### 300 **3. Results**

#### 301 **(a) Experiment 1. Clerodanoid access protects against consumption by predator**

302 All sawflies irrespective of treatment were attacked at least once with no significant effect of  
303 treatment on number of attacks ( $\chi^2 = 5.92$ , d.f. = 2,  $p = 0.052$ ; figure 1*b*). In contrast, the  
304 treatments differed significantly in whether a sawfly was discarded after mouth contact by a  
305 mantid ( $\chi^2 = 21.15$ , d.f. = 2,  $p < 0.001$ ; figure 1*c*, SI 3*a*), with C+ individuals dropped  
306 significantly more often compared to C- (posthoc test:  $p < 0.001$ ) and AC+ (posthoc test:  $p <$   
307  $0.001$ ). Likewise, treatment had a significant effect on whether an individual was consumed  
308 ( $\chi^2 = 21.28$ , d.f. = 2,  $p < 0.001$ ; figure 1*d*, SI 3*b*), with C+ individuals (0% consumed) being  
309 significantly less likely to be consumed compared to C- (100% consumed) (posthoc test:  $p <$   
310  $0.001$ ) and AC+ (70% consumed) (posthoc test:  $p = 0.001$ ).

#### 311 **(b) Experiment 2. C+ individuals are not consumed by predator even after prolonged** 312 **exposure**

313 There was a significant interactive effect of treatment and time on number of sawflies alive  
314 ( $\chi^2 = 36.76$ , d.f. = 3,  $p < 0.001$ ). In the treatment with no mantids, all C- and all but one C+

315 individual survived across all replicates (figure 2*b*). In C- treatments with mantids, no  
316 individual was alive after three-half days. In contrast, for C+ treatments with mantids, all  
317 individuals were alive in two replicates. In the other six C+M+ replicates the number of alive  
318 individuals decreased with time, although in no replicate all individuals were killed. There  
319 was a significant difference in number of consumed sawflies ( $\chi^2 = 15.63$ , d.f. = 1,  $p < 0.001$ ,  
320 figure 2*c*) with all sawflies consumed in the C-M+ treatment, while only few sawflies were  
321 consumed across three replicates in the C+M+ treatment. Similarly, the number of ‘dead but  
322 not consumed’ individuals significantly differed between C-M+ and C+M+ treatments ( $\chi^2 =$   
323 5.95, d.f. = 1,  $p = 0.014$ , figure 2*d*). In four C+ replicates but zero C- replicates, we collected  
324 ‘dead but not consumed’ individuals, suggesting that while the mantids attacked C+  
325 individuals, they were not always consumed.

326 **(c) Experiment 3. Less C- individuals consumed by predator, if C+ individuals are**  
327 **present**

328 Group-composition treatment had a significant effect on the proportion of consumed C-  
329 sawflies ( $\chi^2 = 41.87$ , d.f. = 3,  $p < 0.001$ ; figure 3*a*), with significantly more C- consumed in  
330 the 6C- treatment compared to the 2C+4C- (posthoc test:  $p < 0.001$ ), 3C+3C- (posthoc test:  $p$   
331  $< 0.001$ ), and 4C+2C- (posthoc test:  $p < 0.001$ ) treatments. There was no significant  
332 difference between the other treatments (SI 4*a*). The proportion of alive C- sawflies differed  
333 between the treatments ( $\chi^2 = 27.23$ , d.f. = 3,  $p < 0.001$ ; figure 3*b*), with significantly less C-  
334 alive in the 6C- compared to the 2C+4C- (posthoc test:  $p = 0.005$ ) and 3C+3C- (posthoc test:  
335  $p < 0.001$ ) treatment, while other treatments were not significantly different (SI 4*b*).  
336 Similarly, the proportion of ‘dead but not consumed’ C- sawflies differed between the  
337 treatments ( $\chi^2 = 8.77$ , d.f. = 3,  $p = 0.032$ ; figure 3*c*), with significantly more C- sawflies being  
338 ‘dead but not consumed’ in the 4C+2C- compared to the 6C- treatment (posthoc test:  $p =$   
339 0.029), and no other significant differences between treatments (SI 4*c*). Similarly, to

340 experiment 2, C+ sawflies were consumed rarely, although in many replicates there were  
341 ‘dead but not consumed’ C+ individuals (SI 5a-c).

342 The chemical analysis revealed that the putative clerodanoids 482.22 m/z and 484.23 m/z  
343 could be detected in sixteen (~94%) and fourteen (~82%), respectively, of the seventeen  
344 sampled C- sawflies from mixed group-composition treatments (figure 4a,b). All ten (100%)  
345 C+ sawflies had acquired both putative clerodanoids (figure 4). There was intraspecific  
346 variation in the amount of clerodanoids acquired for both C+ and C- sawflies of mixed  
347 groups. Two out of six replicates of the 6C- group-treatment also had small amounts of  
348 clerodanoids (figure 4), possibly resulting from contamination as these replicates were placed  
349 in the microcosms where previously mixed group-composition treatments were housed. This  
350 contamination could also potentially explain why these C- sawflies were not consumed by the  
351 mantids. C+ sawflies had significantly higher amounts of both clerodanoids, 482.22 m/z ( $\chi^2 =$   
352 10.98, d.f. = 1,  $p < 0.001$ , figure 4a) and 484.23 m/z ( $\chi^2 = 15.75$ , d.f. = 1,  $p < 0.001$ , figure  
353 4b), than C- sawflies for mixed group-composition treatments.

#### 354 **4. Discussion**

355 Chemical defense as an anti-predator strategy is widespread and well-documented in animals  
356 (Speed *et al.*, 2012). However, it is less clear if such chemical defense can be intraspecifically  
357 transmitted and whether presence of chemically defended individuals can confer protection  
358 onto undefended conspecifics. In some species, such defensive chemicals can be taken up  
359 independently of the nutrient-delivering food source, as in the case of our study organism,  
360 *A. rosae*, that takes up clerodanoids (and potentially also other chemicals)  
361 pharmacophagously from *A. reptans* plants and likely metabolized them (Paul *et al.*, 2021b).  
362 Here, we showed that direct access to *A. reptans* leaves serves as defense against predation by  
363 making the sawflies unpalatable to the predator. We also demonstrated that clerodanoid

364 access provides protection not only to focal individuals but also to conspecifics in mixed  
365 groups of C+ and C- individuals.

366 While most sawflies without access to clerodanoids were lethally attacked and consumed by  
367 the mantids, only very few sawflies that had taken up clerodanoids from leaves were  
368 consumed, as we had predicted. Nevertheless, many sawflies with clerodanoid access were  
369 also attacked but then readily rejected by the mantids, as shown by the ‘discarding after  
370 mouth contact’ behavior in experiment 1 and by the higher number of ‘dead but not  
371 consumed’ sawflies in experiment 2. This rejection is likely induced by the bitter taste of the  
372 clerodanoids that may be deposited on the cuticle and in body tissue of the adult sawfly  
373 (Nishida & Fukami, 1990). When tested directly, two clerodanoids (clerodendrin B and D)  
374 had a deterrent effect on Japanese tree sparrows, who consumed fewer rice grains that had  
375 been treated with the clerodanoids compared to untreated grains (Nishida & Fukami, 1990). A  
376 taste-rejection behavior, in which predators taste but do not ingest a prey item, as found by  
377 the mantids in the present experiment, has been shown to be elicited by distasteful prey and  
378 can lead to an increased survivorship of the prey (Halpin & Rowe, 2017). Although we did  
379 not quantify the long term survivorship of sawflies after mantid attack in experiment 1, visual  
380 inspection showed that the damage spectrum ranged from nearly unharmed to dead sawflies  
381 (SI 1a,b), indicating that clerodanoid uptake could lead to survivorship advantages.

382 Adult *A. rosae* can acquire clerodanoids not only from plants but also from conspecifics *via*  
383 nibbling on their body surface. However, acquiring clerodanoids indirectly from conspecifics  
384 resulted in less protection than direct acquisition from the plants in *A. rosae* in our  
385 experiments. Not all sawflies successfully acquire sufficient clerodanoid amounts from C+  
386 conspecifics (Paul *et al.*, 2021a) and the concentrations could be much lower than after direct  
387 uptake from the *A. reptans* leaves (figure 4). Such quantitative and potentially also qualitative  
388 differences in clerodanoid acquisition may explain, why many AC+ sawflies (experiment 1)



389 and C- sawflies in mixed C+ C- group treatments (experiment 3) were consumed by mantids.  
390 The effectiveness of defense chemicals sequestered from host plants against predators has  
391 been shown to be concentration-dependent in a glucosinolate-sequestering leaf beetle species,  
392 with individuals having lower levels of sequestered glucosinolates being more susceptible to  
393 predation (Sporer *et al.*, 2020). In *A. rosae*, transfer of clerodanoids can occur both within and  
394 between sexes (Paul *et al.*, 2021a), which seems rather exceptional. In other insect species,  
395 usually chemicals are transferred from the male to the female during mating. For example, in  
396 some arctiid moth species, pyrrolizidine alkaloids are sexually transmitted from males to  
397 females, and these chemicals render protection against predation to the recipient female  
398 (Gonzalez *et al.*, 1999; Conner *et al.*, 2000). Moreover, such defensive chemicals acquired by  
399 the female from the male can also be incorporated into the offspring (Eisner *et al.*, 2002;  
400 Camarano *et al.*, 2009; Sternberg *et al.*, 2015) providing it with benefits. Evidence for such  
401 benefits of parental clerodanoid access to offspring in *A. rosae* is currently lacking (Paul *et*  
402 *al.*, 2021b).

403 Our data from the predation microcosm experiment (experiment 2) demonstrated that the  
404 mantids attacked C+ sawflies, with number of alive sawflies decreasing over time, but this  
405 decline was less rapid than that of C- sawflies in presence of mantids. This suggests that the  
406 mantids may learn to avoid C+ sawflies after first encounters, leading to a longer survival  
407 period of the sawflies. Learned aversion has been found in the mantid *Tenodera aridifolia*,  
408 where the mantids reduced attacks on certain prey items when these prey items were made  
409 bitter (Carle *et al.*, 2018). Similarly, repeated exposure to unpalatable milkweed bugs that had  
410 sequestered cardenolides from their host plants led to avoidance by *T. aridifolia* of both  
411 palatable and unpalatable milkweed bugs altogether (Berenbaum & Miliczky, 1984).  
412 Interestingly, the mantid *H. patellifera* attacked sawflies in both experiment 2 and 3 despite  
413 having been exposed to the C+ sawflies previously, suggesting that such avoidance learning

414 may not last long, as also seen in *T. aridifolia* (Prudic *et al.*, 2007). Moreover, such avoidance  
415 learning can be more effective if the distasteful prey is conspicuously colored (Roper &  
416 Redston, 1987; Raška *et al.*, 2017). Indeed, organisms that use chemical defenses are usually,  
417 but not always, brightly colored and conspicuous, i.e. aposematic, to advertise their  
418 distastefulness to predators (Poulton, 1890; Kikuchi *et al.*, 2021). The sawfly *A. rosae*, used  
419 in our study, is aposematically colored, with a bright orange body (SI 1), which might  
420 facilitate temporary avoidance learning by mantids.

421 In line with our prediction, the presence of C+ sawflies was beneficial for C- sawflies with a  
422 smaller proportion of C- sawflies consumed in group-composition treatments that had C+  
423 individuals present compared to groups of C- sawflies only. This suggests that presence of  
424 chemically defended sawflies can lead to ‘herd protection’ of conspecifics. Such protection  
425 may result from the C- individuals acquiring clerodanoids, or temporary learned avoidance of  
426 C- by mantids after encountering C+ sawflies. Our chemical analysis showed that most, but  
427 not all, sawflies had acquired detectable amounts of clerodanoids, suggesting that both of  
428 these mechanisms could play a role in the ‘herd-protection’ of C- conspecifics. In our  
429 experiment, there was no significant change in the expected direction in number of consumed  
430 C- sawflies across the gradient of the C+ and C- mixed group-composition treatments. This  
431 may have been due to the small number of sawflies used (six), and hence only small  
432 differences between the mixed treatments. A study using the domestic chick, *Gallus gallus*  
433 *domesticus*, as predator showed that the birds rejected the mimics (palatable prey items) less  
434 frequently when the relative abundance of these mimics compared to the models (unpalatable  
435 prey items) increased, but birds only discriminated between the models and mimics when the  
436 frequency of mimics was above 25% (Skelhorn & Rowe, 2007). Moreover, density-  
437 dependence of predation can also be influenced by other factors such as predator behavior,  
438 e.g. learning, forgetting and memory (Speed & Turner, 1999), and the energetic and

439 informational state of the predator, leading to state-dependent decision-making (Aubier &  
440 Sherratt, 2020).

441 In natural populations of *A. rosae*, intraspecific variation in clerodanoid uptake could be  
442 expected if the distribution of pharmacophagy-suitable plants is patchy, if there in  
443 intraspecific variation in the clerodanoid concentrations available from the plants, or if there  
444 are associated costs of clerodanoid uptake. Indeed, *A. rosae* individuals that were exposed to  
445 clerodanoids had a shorter lifespan than control individuals (Zanchi *et al.*, 2021). This  
446 suggests that there might be costs to clerodanoid uptake, although clerodanoid access did not  
447 immediately cause high mortality during our observed period in experiment 2 (figure 2*b*).  
448 Similar costs of chemical defense have been revealed in swallowtail butterflies of the tribe  
449 Troidini which showed reduced larval survivorship (Dimarco & Fordyce, 2017) or a reduction  
450 in adult fat content (Fordyce & Nice, 2008) when sequestering toxic alkaloids. Our study  
451 demonstrates that even if individuals do not take up clerodanoids, they could still benefit  
452 indirectly from conspecifics that do. This could lead to emergence of cheaters that do not pay  
453 the cost of chemical defense but enjoy the benefits (Lindstedt *et al.*, 2018). Future studies  
454 should examine variation in clerodanoid contents in natural populations of *A. rosae*. In  
455 conclusion, our study showed that clerodanoids serve as chemical defense for *A. rosae* that  
456 can be intraspecifically transferred. Furthermore, chemically defended sawflies can confer  
457 protection onto conspecifics that had no direct access to clerodanoids in a group, indicating a  
458 ‘herd-protection’ effect.

459

## 460 **References**

461 Amano, T., Nishida, R., Kuwahara, Y. & Fukami, H. (1999) Pharmacophagous acquisition of  
462 clerodendrins by the turnip sawfly (*Athalia rosae ruficornis*) and their role in the mating  
463 behavior. *Chemoecology*, **9**, 145–150.

- 464 Arias, M., Meichanetzoglou, A., Elias, M., Rosser, N., Silva, D.L. de-, Nay, B., *et al.* (2016) Variation in  
465 cyanogenic compounds concentration within a *Heliconius* butterfly community: does mimicry  
466 explain everything? *BMC Evolutionary Biology*, **16**, 272.
- 467 Aubier, T.G., Joron, M. & Sherratt, T.N. (2017) Mimicry among unequally defended prey should be  
468 mutualistic when predators sample optimally. *The American Naturalist*, **189**, 267–282.
- 469 Aubier, T.G. & Sherratt, T.N. (2020) State-dependent decision-making by predators and its  
470 consequences for mimicry. *The American Naturalist*, **196**, E127–E144.
- 471 Bates, D., Mächler, M., Bolker, B. & Walker, S. (2015) Fitting linear mixed-effects models using lme4.  
472 *Journal of Statistical Software*, **67**, 1–48.
- 473 Berenbaum, M.R. & Miliczky, E. (1984) Mantids and milkweed bugs: efficacy of aposematic coloration  
474 against invertebrate predators. *American Midland Naturalist*, **111**, 64.
- 475 Bergen, E. & Beldade, P. (2019) Seasonal plasticity in anti-predatory strategies: Matching of color and  
476 color preference for effective crypsis. *Evolution Letters*, **3**, 313–320.
- 477 Best, R., Ruxton, G.D. & Gardner, A. (2018) Intragroup and intragenomic conflict over chemical  
478 defense against predators. *Ecology and Evolution*, **8**, 3322–3329.
- 479 Boevé, J.-L. & Müller, C. (2005) Defence effectiveness of easy bleeding sawfly larvae towards  
480 invertebrate and avian predators. *Chemoecology*, **15**, 51–58.
- 481 Boppré, M. (1984) Redefining “pharmacophagy.” *Journal of Chemical Ecology*, **10**, 1151–1154.
- 482 Brower, L.P., Pough, F.H. & Meck, H. (1970) Theoretical investigations of automimicry, I. Single trial  
483 learning. *Proceedings of the National Academy of Sciences*, **66**, 1059–1066.
- 484 Camarano, S., González, A. & Rossini, C. (2009) Biparental endowment of endogenous defensive  
485 alkaloids in *Epilachna paenulata*. *Journal of Chemical Ecology*, **35**, 1–7.
- 486 Carle, T., Horiwaki, R., Hurlbert, A. & Yamawaki, Y. (2018) Aversive learning in the praying mantis  
487 (*Tenodera aridifolia*), a sit and wait predator. *Journal of Insect Behavior*, **31**, 158–175.
- 488 Castro, É.C.P. de, Musgrove, J., Bak, S., McMillan, W.O. & Jiggins, C.D. (2021) Phenotypic plasticity in  
489 chemical defence of butterflies allows usage of diverse host plants. *Biology Letters*, **17**,  
490 rsbl.2020.0863, 20200863.
- 491 Chouteau, M., Arias, M. & Joron, M. (2016) Warning signals are under positive frequency-dependent  
492 selection in nature. *Proceedings of the National Academy of Sciences*, **113**, 2164–2169.
- 493 Chung, Y., Rabe-Hesketh, S., Dorie, V., Gelman, A. & Liu, J. (2013) A nondegenerate penalized  
494 likelihood estimator for variance parameters in multilevel models. *Psychometrika*, **78**, 685–  
495 709.
- 496 Conner, W.E., Boada, R., Schroeder, F.C., Gonzalez, A., Meinwald, J. & Eisner, T. (2000) Chemical  
497 defense: Bestowal of a nuptial alkaloidal garment by a male moth on its mate. *Proceedings of*  
498 *the National Academy of Sciences*, **97**, 14406–14411.
- 499 Cyriac, V.P. & Kodandaramaiah, U. (2019) Don’t waste your time: predators avoid prey with  
500 conspicuous colors that signal long handling time. *Evolutionary Ecology*, **33**, 625–636.
- 501 Dimarco, R.D. & Fordyce, J.A. (2017) Not all toxic butterflies are toxic: high intra- and interspecific  
502 variation in sequestration in subtropical swallowtails. *Ecosphere*, **8**.
- 503 Edmunds, M. (1974) *Defence in animals: a survey of anti-predator defences*. Longman Publishing  
504 Group.
- 505 Eisner, T., Eisner, M., Siegler, M., *et al.* (2005) *Secret weapons: defenses of insects, spiders, scorpions,*  
506 *and other many-legged creatures*. Harvard University Press.
- 507 Eisner, T., Rossini, C., González, A., Iyengar, V.K., Siegler, M.V. & Smedley, S.R. (2002) Paternal  
508 investment in egg defence. In *Chemoecology of insect eggs and egg deposition*. Blackwell  
509 Publishing Oxford, pp. 91–116.
- 510 Erb, M. & Robert, C.A. (2016) Sequestration of plant secondary metabolites by insect herbivores:  
511 molecular mechanisms and ecological consequences. *Current Opinion in Insect Science*, **14**,  
512 8–11.
- 513 Finkbeiner, S.D., Salazar, P.A., Nogales, S., Rush, C.E., Briscoe, A.D., Hill, R.I., *et al.* (2018) Frequency  
514 dependence shapes the adaptive landscape of imperfect Batesian mimicry. *Proceedings of*  
515 *the Royal Society B: Biological Sciences*, **285**, 20172786.

- 516 Fordyce, J.A. & Nice, C.C. (2008) Antagonistic, stage-specific selection on defensive chemical  
517 sequestration in a toxic butterfly. *Evolution*, **62**, 1610–1617.
- 518 Gamberale-Stille, G. & Guilford, T. (2004) Automimicry destabilizes aposematism: predator sample-  
519 and-reject behaviour may provide a solution. *Proceedings of the Royal Society of London.*  
520 *Series B: Biological Sciences*, **271**, 2621–2625.
- 521 González, A., Rossini, C., Eisner, M. & Eisner, T. (1999) Sexually transmitted chemical defense in a  
522 moth (*Utetheisa ornatrix*). *Proceedings of the National Academy of Sciences*, **96**, 5570–5574.
- 523 Halpin, C.G. & Rowe, C. (2016) The effect of distastefulness and conspicuous coloration on the post-  
524 attack rejection behaviour of predators and survival of prey. *Biological Journal of the Linnean*  
525 *Society*.
- 526 Hämäläinen, L., Mappes, J., Rowland, H.M., Teichmann, M. & Thorogood, R. (2020) Social learning  
527 within and across predator species reduces attacks on novel aposematic prey. *Journal of*  
528 *Animal Ecology*, **89**, 1153–1164.
- 529 Hashimoto, K. & Hayashi, F. (2014) Cantharidin world in nature: a concealed arthropod assemblage  
530 with interactions via the terpenoid cantharidin: Arthropods interacted via cantharidin.  
531 *Entomological Science*, **17**, 388–395.
- 532 Hothorn, T., Bretz, F. & Westfall, P. (2008) Simultaneous inference in general parametric models.  
533 *Biometrical Journal*, **50**, 346–363.
- 534 Kawai, K., Amano, T., Nishida, R., Kuwahara, Y. & Fukami, H. (1998) Clerodendrins from *Clerodendron*  
535 *trichotomum* and their feeding stimulant activity for the turnip sawfly. *Phytochemistry*, **49**,  
536 1975–1980.
- 537 Kikuchi, D.W., Herberstein, M.E., Barfield, M., Holt, R.D. & Mappes, J. (2021) Why aren't warning  
538 signals everywhere? On the prevalence of aposematism and mimicry in communities.  
539 *Biological Reviews*, **96**, 2446–2460.
- 540 Lawson, N., Vane-Wright, R.I. & Boppré, M. (2021) The puzzle of monarch butterflies (*Danaus*  
541 *plexippus*) and their association with plants containing pyrrolizidine alkaloids. *Ecological*  
542 *Entomology*, **46**, 999–1005.
- 543 Lindstedt, C., Miettinen, A., Freitak, D., Ketola, T., López-Sepulcre, A., Mäntylä, E., *et al.* (2018)  
544 Ecological conditions alter cooperative behaviour and its costs in a chemically defended  
545 sawfly. *Proceedings of the Royal Society B: Biological Sciences*, **285**, 20180466.
- 546 Matsubara, S. & Sugiura, S. (2017) Chemical defence of turnip sawfly larvae against Japanese tree  
547 frogs. *Journal of Asia-Pacific Entomology*, **20**, 225–227.
- 548 Mattila, A.L.K., Jiggins, C.D., Opedal, Ø.H., Montejo-Kovacevich, G., Pinheiro de castro, É.C., McMillan,  
549 W.O., *et al.* (2021) Evolutionary and ecological processes influencing chemical defense  
550 variation in an aposematic and mimetic *Heliconius* butterfly. *PeerJ*, **9**, e11523.
- 551 Matz, C., Webb, J.S., Schupp, P.J., Phang, S.Y., Penesyan, A., Egan, S., *et al.* (2008) Marine biofilm  
552 bacteria evade eukaryotic predation by targeted chemical defense. *PLoS ONE*, **3**, e2744.
- 553 Müller, C. & Arand, K. (2007) Trade-offs in oviposition choice? Food-dependent performance and  
554 defence against predators of a herbivorous sawfly. *Entomologia Experimentalis et Applicata*,  
555 **124**, 153–159.
- 556 Müller, C. & Brakefield, P.M. (2003) Analysis of a chemical defense in sawfly larvae: Easy bleeding  
557 targets predatory wasps in late summer. *Journal of Chemical Ecology*, **29**, 2683–2694.
- 558 Müller, C. & Sieling, N. (2006) Effects of glucosinolate and myrosinase levels in *Brassica juncea* on a  
559 glucosinolate-sequestering herbivore – and vice versa. *Chemoecology*, **16**, 191–201.
- 560 Nishida, R. (2014) Chemical ecology of insect–plant interactions: ecological significance of plant  
561 secondary metabolites. *Bioscience, Biotechnology, and Biochemistry*, **78**, 1–13.
- 562 Nishida, R. & Fukami, H. (1990) Sequestration of distasteful compounds by some pharmacophagous  
563 insects. *Journal of Chemical Ecology*, **16**, 151–164.
- 564 Opitz, S.E.W., Jensen, S.R. & Müller, C. (2010) Sequestration of glucosinolates and iridoid glucosides  
565 in sawfly species of the genus *Athalia* and their role in defense against ants. *Journal of*  
566 *Chemical Ecology*, **36**, 148–157.

- 567 Opitz, S.E.W. & Müller, C. (2009) Plant chemistry and insect sequestration. *Chemoecology*, **19**, 117–  
568 154.
- 569 Pančić, M. & Kiørboe, T. (2018) Phytoplankton defence mechanisms: traits and trade-offs. *Biological*  
570 *Reviews*, **93**, 1269–1303.
- 571 Paul, S.C., Dennis, A.B., Tewes, L.J., Friedrichs, J. & Müller, C. (2021a) Consequences of  
572 pharmacophagous uptake from plants and conspecifics in a sawfly elucidated using chemical  
573 and molecular techniques (preprint). BioRxiv (doi: 10.1101/2021.02.09.430406).
- 574 Paul, S.C. & Müller, C. (2021) Fighting over defence chemicals disrupts mating behaviour. In press.  
575 *Behavioral Ecology*.
- 576 Paul, S.C., Singh, P., Dennis, A.B. & Müller, C. (2021b) Intergenerational Effects of Early Life Starvation  
577 on Life-History, Consumption, and Transcriptome of a Holometabolous Insect. In press. *The*  
578 *American Naturalist*.
- 579 Poulton, E.B. (1890) *The colours of animals: their meaning and use, especially considered in the case*  
580 *of insects*. D. Appleton.
- 581 Prudic, K.L., Skemp, A.K. & Papaj, D.R. (2007) Aposematic coloration, luminance contrast, and the  
582 benefits of conspicuousness. *Behavioral Ecology*, **18**, 41–46.
- 583 Prudic, K.L., Timmermann, B.N., Papaj, D.R., Ritland, D.B. & Oliver, J.C. (2019) Mimicry in viceroy  
584 butterflies is dependent on abundance of the model queen butterfly. *Communications*  
585 *Biology*, **2**, 68.
- 586 R Core Team. (2021) *R: A Language and Environment for Statistical Computing*. R Foundation for  
587 Statistical Computing, Vienna, Austria.
- 588 Raška, J., Štys, P. & Exnerová, A. (2017) How variation in prey aposematic signals affects avoidance  
589 learning, generalization and memory of a salticid spider. *Animal Behaviour*, **130**, 107–117.
- 590 Roper, T.J. & Redston, S. (1987) Conspicuousness of distasteful prey affects the strength and  
591 durability of one-trial avoidance learning. *Animal Behaviour*, **35**, 739–747.
- 592 Rowland, H.M., Burriss, R.P. & Skelhorn, J. (2020) The antipredator benefits of postural camouflage in  
593 peppered moth caterpillars. *Scientific Reports*, **10**, 21654.
- 594 Santos, J.C., Tarvin, R.D. & O’Connell, L.A. (2016) A review of chemical defense in poison Frogs  
595 (Dendrobatidae): Ecology, pharmacokinetics, and autoresistance. In *Chemical Signals in*  
596 *Vertebrates 13* (ed. by Schulte, B.A., Goodwin, T.E. & Ferkin, M.H.). Springer International  
597 Publishing, Cham, pp. 305–337.
- 598 Sawa, M., Fukunaga, A., Naito, T., Oishi, K., & others. (1989) Studies on the sawfly, *Athalia rosae*  
599 (Insecta, Hymenoptera, Tenthredinidae). I. General biology. *Zoological Science*, **6**, 541–547.
- 600 Sculfort, O., Castro, E.C.P., Kozak, K.M., Bak, S., Elias, M., Nay, B., *et al.* (2020) Variation of chemical  
601 compounds in wild *Heliconiini* reveals ecological factors involved in the evolution of chemical  
602 defenses in mimetic butterflies. *Ecology and Evolution*, **10**, 2677–2694.
- 603 Skelhorn, J. & Rowe, C. (2007) Automimic frequency influences the foraging decisions of avian  
604 predators on aposematic prey. *Animal Behaviour*, **74**, 1563–1572.
- 605 Skelhorn, J., Rowland, H.M., Delf, J., Speed, M.P. & Ruxton, G.D. (2011) Density-dependent predation  
606 influences the evolution and behavior of masquerading prey. *Proceedings of the National*  
607 *Academy of Sciences*, **108**, 6532–6536.
- 608 Smilanich, A.M., Dyer, L.A., Chambers, J.Q. & Bowers, M.D. (2009) Immunological cost of chemical  
609 defence and the evolution of herbivore diet breadth. *Ecology Letters*, **12**, 612–621.
- 610 Speed, M.P., Ruxton, G.D., Mappes, J. & Sherratt, T.N. (2012) Why are defensive toxins so variable?  
611 An evolutionary perspective. *Biological Reviews*, **87**, 874–884.
- 612 Speed, M.P. & Turner, J.R.G. (1999) Learning and memory in mimicry: II. Do we understand the  
613 mimicry spectrum? *Biological Journal of the Linnean Society*, **67**, 281–312.
- 614 Sporer, T., Körnig, J. & Beran, F. (2020) Ontogenetic differences in the chemical defence of flea  
615 beetles influence their predation risk. *Functional Ecology*, **34**, 1370–1379.
- 616 Sternberg, E.D., Roode, J.C. de & Hunter, M.D. (2015) Trans-generational parasite protection  
617 associated with paternal diet. *Journal of Animal Ecology*, **84**, 310–321.
- 618 Sugiura, S. (2020) Predators as drivers of insect defenses. *Entomological Science*, **23**, 316–337.

- 619 Tea, Y., Soong, J.W., Beaver, E.P. & Lohman, D.J. (2021) Kleptopharmacophagy: Milkweed butterflies  
620 scratch and imbibe from *Apocynaceae*-feeding caterpillars. *Ecology*.
- 621 Travers-Martin, N. & Müller, C. (2008) Matching plant defence syndromes with performance and  
622 preference of a specialist herbivore. *Functional Ecology*, **22**, 1033–1043.
- 623 Tuttle, L.J., Lamb, R.W. & Stringer, A.L. (2021) Differential learning by native versus invasive  
624 predators to avoid distasteful cleaning mutualists. *Functional Ecology*, **35**, 1481–1490.
- 625 Vlieger, L., Brakefield, P.M. & Müller, C. (2004) Effectiveness of the defence mechanism of the turnip  
626 sawfly, *Athalia rosae* (Hymenoptera: Tenthredinidae), against predation by lizards. *Bulletin of*  
627 *Entomological Research*, **94**, 283–289.
- 628 Zanchi, C., Lo, L.K., R, R., Moritz, I., Kurtz, J. & Müller, C. (2021) Survival of the sawfly *Athalia rosae*  
629 upon infection by an entomopathogenic fungus and in relation to clerodanoid uptake.  
630 *Frontiers in Physiology*, **12**, 637617.
- 631 Züst, T., Mou, S. & Agrawal, A.A. (2018) What doesn't kill you makes you stronger: The burdens and  
632 benefits of toxin sequestration in a milkweed aphid. *Functional Ecology*, **32**, 1972–1981.
- 633 Zvereva, E.L. & Kozlov, M.V. (2015) The costs and effectiveness of chemical defenses in herbivorous  
634 insects: a meta-analysis. *Ecological Monographs*, 15-0911.1.  
635

636 **Figures**

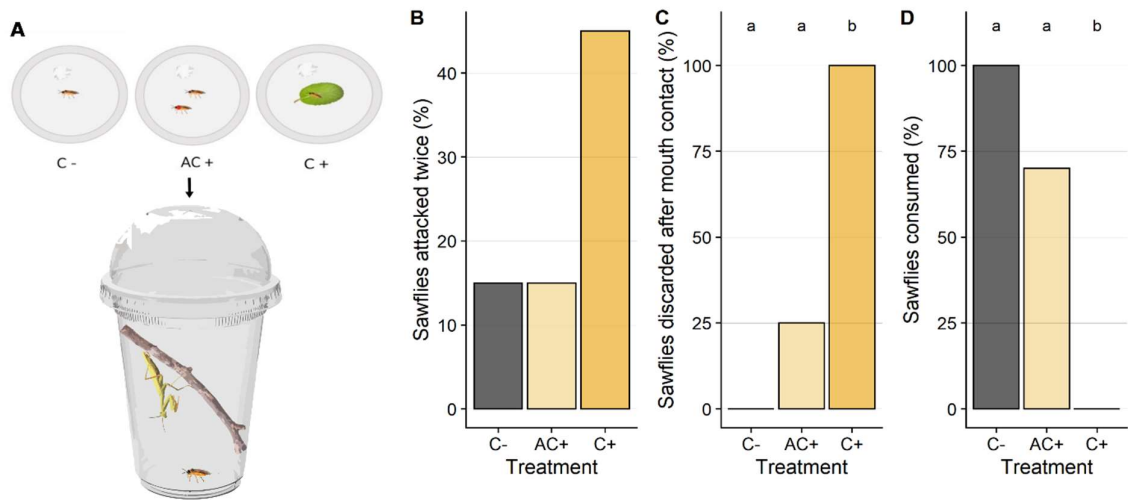

637

638 Figure 1. (A) Experimental design illustration of no-choice feeding assay, where each mantid  
639 was exposed to one *Athalia rosae* sawfly of different clerodanoid treatments (C- no access,  
640 AC+ indirect access via conspecific that had contact with leaf of *Ajuga reptans*, C+ direct  
641 access to *A. reptans*) over multiple trials performed in different orders. Effects of clerodanoid  
642 treatment on percentage of sawflies that were (B) attacked twice (all other sawflies were  
643 attacked once), (C) discarded after mouth contact, and (D) consumed, by mantid ( $n = 20$   
644 replicates per treatment). Different letters denote significantly different treatment effects  
645 inferred from Tukey HSD post hoc tests.

646



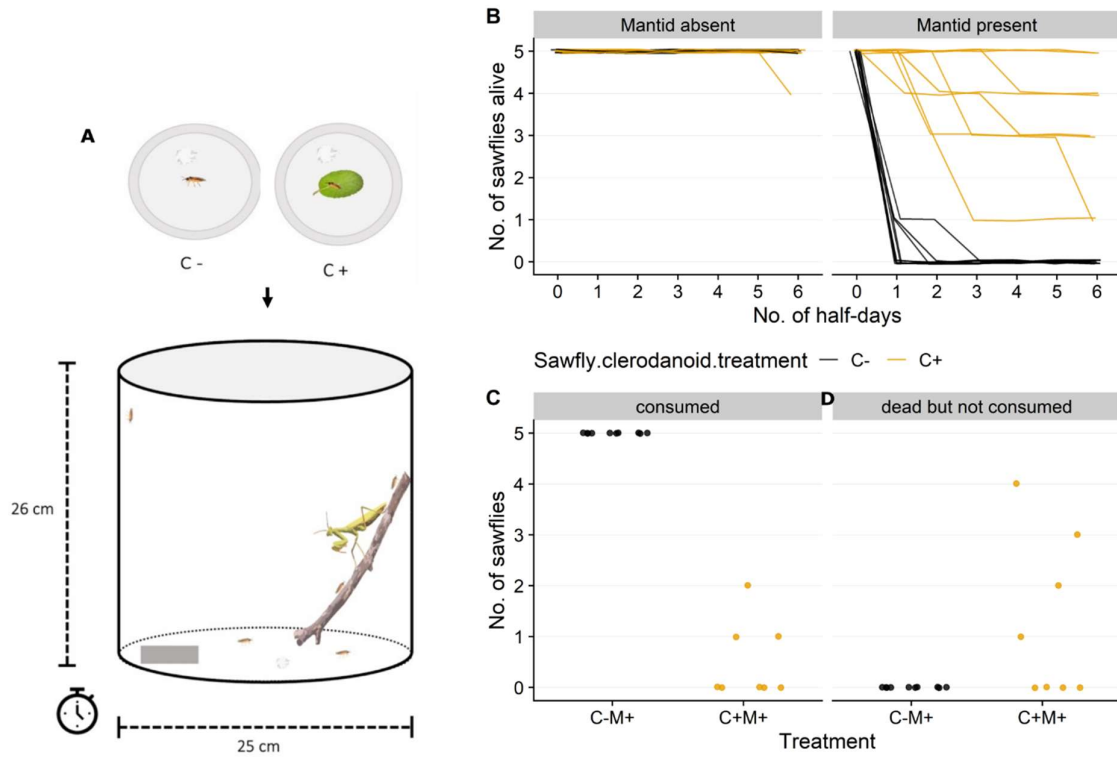

647

648 Figure 2. (A) Experimental design illustration of clerodanoid treatment (C- no access, C+

649 access to leaf of *Ajuga reptans*) and predation microcosm experiment, where in each

650 microcosm five *Athalia rosae* sawflies were added that were either C- or C+ and with-or-

651 without a mantid. B) Number of alive sawflies of different clerodanoid treatments over time.

652 Lines are jittered to decrease overlapping. Number of C- and C+ individuals that were (C)

653 consumed or (D) ‘dead but not consumed’ in replicates of mantid present (M+) treatment.

654

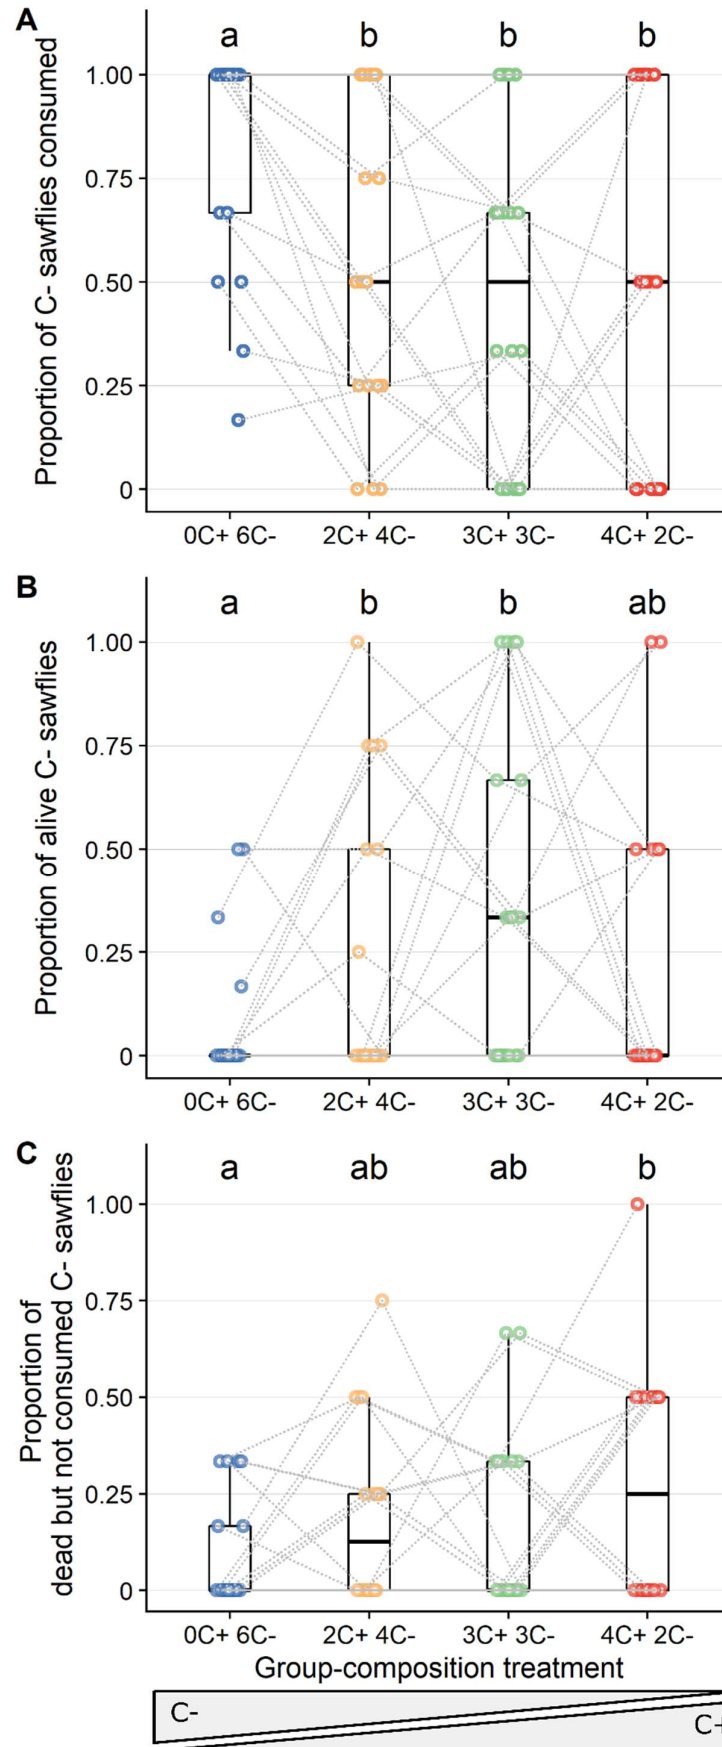

656 Figure 3. Effects of different group-composition, i.e. varying relative abundance of *Athalia*  
657 *rosae* sawflies with (C+) and without (C-) access to a leaf of *Ajuga reptans* and thus  
658 clerodanoids, on proportions of (A) consumed, (B) alive, and (C) ‘dead but not consumed’ C-  
659 sawflies in presence of a mantid. Data are presented as boxplots, medians and interquartile  
660 with individual data points also plotted. Grey dotted lines connect data from each mantid ( $n =$   
661 18) across trials. Note that abundance of C- sawflies decreases and C+ increases from left to  
662 right.

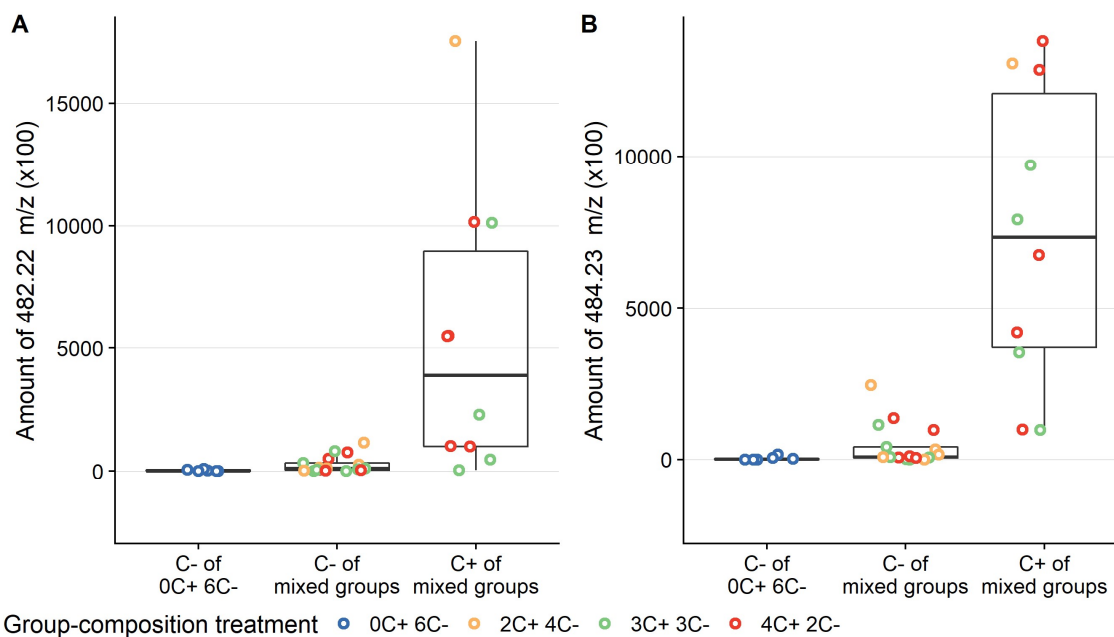

664 Figure 4. Amount (peak area) of candidate chemical features representing putative  
665 clerodanoids, (A) 482.22 m/z ( $C_{24}H_{34}O_{10}$ ) and (B) 484.23 m/z ( $C_{24}H_{36}O_{10}$ ), respectively, from  
666 the extracted ion chromatograms for C- (without access to a leaf of *Ajuga reptans*) and C+  
667 (with access to a leaf of *A. reptans*) sawflies of different group-composition treatments.  
668 Mixed groups represent groups that had both C+ and C- sawflies present in the microcosm,  
669 while 0C+6C- had only C- sawflies present.
